# Supplementary material
Source: PubMed Central journal article supplement (PMC2872404)
Supplement: 0914077107_pnas.0914077107_SI.pdf [file 0914077107_pnas.0914077107_SI.pdf]

# Supporting Information

Cuneo et al. 10.1073/pnas.0914077107

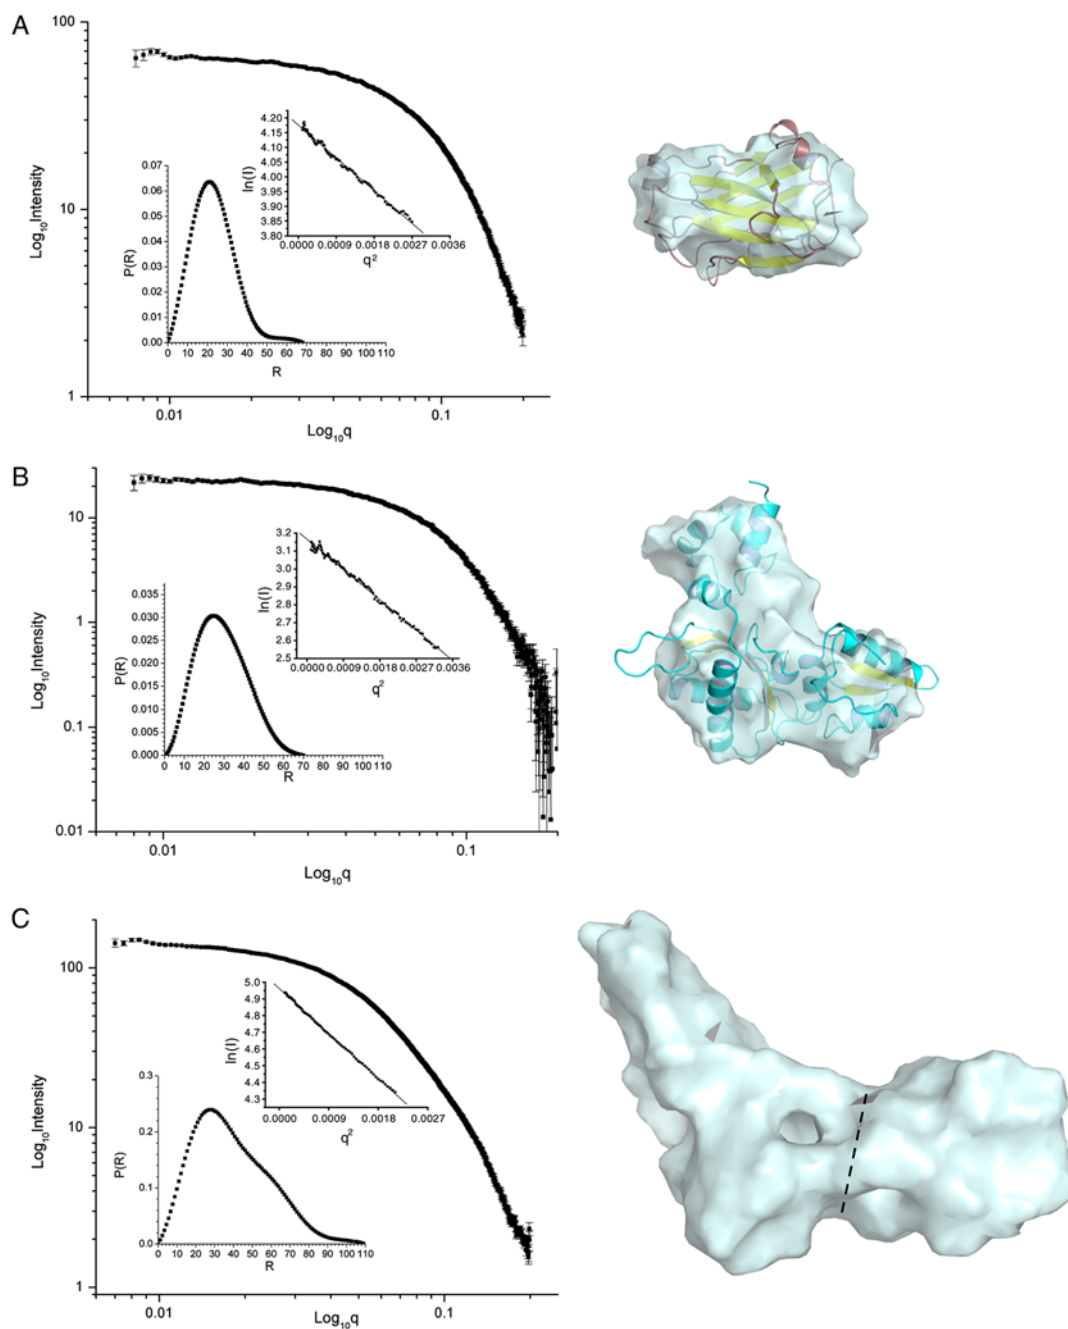

**Fig. S1.** Small-angle x-ray scattering (SAXS) of XRCC1-N-terminal domain (NTD) and Pol  $\beta$  CD. (A) XRCC1-NTD alone, reduced form (13.7 mg/mL), (B) Pol  $\beta$  CD alone (3.0 mg/mL), and (C) XRCC1-NTD in the reduced form complexed with Pol  $\beta$  CD (12.3 mg/mL). (Left) SAXS intensity  $I(q)$  data inset with pairwise vector length distribution curve and Guinier fit of the  $I(q)$  scattering data; (Right) ab initio models derived from SAXS intensity data (surface representation) superimposed with crystal structures. The model in C has been divided into two regions of shape and size that are similar to the respective SAXS and crystal structure models of the two component proteins (black dashed line).

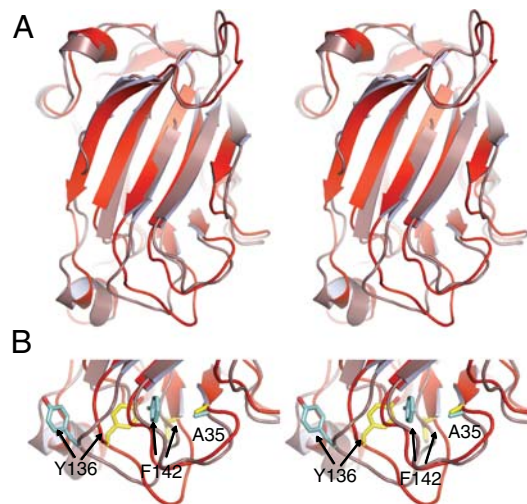

**Fig. 52.** Comparison of the x-ray crystal and NMR structures of XRCC1-NTD. The crystal structure is shown as a violet ribbon with gray side chains, and the NMR structure as a red ribbon with yellow side chains. (A) Stereoview of the x-ray crystal structure of XRCC1-NTD superimposed with the NMR structure. (B) Close-up stereoview of the region of the models showing significant variation in structure and indicating the difference in relative orientation of Ala35 and Phe142. The position of Y135 on the surface of the molecule allows it to interact directly with Pol  $\beta$  in the complex, consistent with mutagenesis data of Marintchev et al. (1).

1 Marintchev A, Gryk MR, Mullen GP (2003) Site-directed mutagenesis analysis of the structural interaction of the single-strand-break repair protein, x-ray cross-complementing group 1, with DNA polymerase beta. *Nucleic Acids Res* 31:580–588.

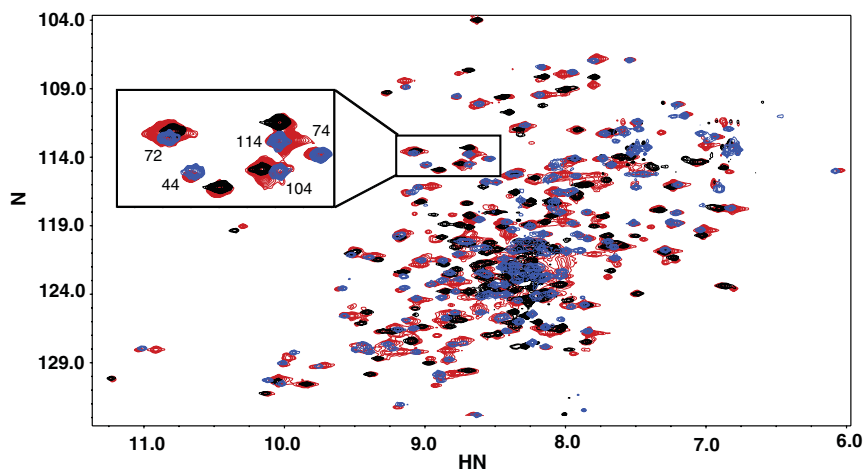

**Fig. 53.**  $^1\text{H}$ - $^{15}\text{N}$  heteronuclear single quantum coherence NMR spectra of XRCC1-NTD. Wild-type XRCC1-NTD (blue); XRCC1 I4D (black); wild-type XRCC1-NTD treated with 5 mM  $\text{H}_2\text{O}_2$  (red). Inset shows an expanded region of the spectra with residue assignments of the wild-type XRCC1-NTD, demonstrating that the  $\text{H}_2\text{O}_2$ -treated spectrum is composed of a mixture of reduced protein, protein that coresonates with the I4D mutant, as well as some additional resonances. In many cases, resonances arising from residues positioned far from the disulfide-induced structural changes are not significantly shifted.

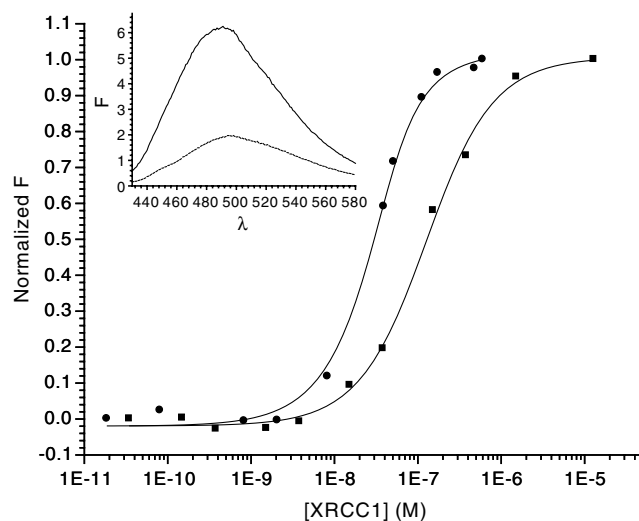

**Fig. S4.** Determination of Pol  $\beta$  CD/XRCC1 dissociation constant. Titration of aminosulfonylbenzofuranan (ABD)-labeled Pol  $\beta$  CD P300C mutant with XRCC1-NTD (■) and XRCC1 I4D (●). Solid lines are a fit to a two-state binding isotherm. An intensity increase of  $\sim 300\%$  is observed (*Inset*) when saturating amounts of XRCC1-NTD are added.

**Table S1. SAXS data analysis**

| Sample                                         | $I_0/C$        |          | MW, kDa    |          | CRSYOL $\chi$ | $R_{g(\text{exp})}$ , Å | $R_{g(\text{calc})}$ , Å | $D_{\text{max}}$ , Å |
|------------------------------------------------|----------------|----------|------------|----------|---------------|-------------------------|--------------------------|----------------------|
|                                                | Observed       | Expected | Calculated | Expected |               |                         |                          |                      |
| Lysozyme                                       | $4.3 \pm 0.4$  |          |            | 14.3     | 1.3           | $15.8 \pm 0.07$ *       | 15.4                     | 43                   |
| XRCC1tr-NTD (residues 1–151)                   | $5.0 \pm 0.1$  | 5.4      | 16.6       | 17.9     | 2.0           | $17.4 \pm 0.04$ *       | 16.7                     | 68                   |
| Pol $\beta$ catalytic domain (residues 91–335) | $8.6 \pm 0.2$  | 8.7      | 28.8       | 29.0     | 2.5           | $22.8 \pm 0.2$          | 23.2                     | 70                   |
| Complex                                        | $12.7 \pm 0.3$ | 14.1     | 42.6       | 46.9     | 2.1           | $30.7 \pm 0.4$          | 28.8                     | 110                  |

\* $R_g$  was extrapolated to zero concentration.

**Table S2. Data collection and refinement statistics**

|                                          | Oxidized complex            | Reduced complex                          | XRCC1-NTD                              |
|------------------------------------------|-----------------------------|------------------------------------------|----------------------------------------|
| Resolution range, Å                      | 30.0–2.35                   | 25.0–2.95                                | 30.0–2.6                               |
| Unique reflections                       | 17,765                      | 19,123                                   | 32,108                                 |
| Redundancy                               | 10.3 (7.1)                  | 3.6 (3.6)                                | 2.8 (2.7)                              |
| Mean $I/\sigma(I)$ *                     | 19.0 (4.20)                 | 17.7 (4.3)                               | 8.8 (3.8)                              |
| $R_{\text{merged}}$ , % *                | 11.7 (50.3)                 | 7.4 (33.9)                               | 7.4 (33.9)                             |
| Completeness, % *                        | 99.8 (99.0)                 | 98.7 (99.6)                              | 98.0 (95.6)                            |
| <i>Unit Cell</i>                         |                             |                                          |                                        |
| Dimensions, Å                            | $a/b = 75.2$<br>$c = 126.2$ | $a = 140.8$<br>$b = 44.1$<br>$c = 152.8$ | $a = 64.5$<br>$b = 89.3$<br>$c = 93.2$ |
| Angles, °                                |                             | $\beta = 107.2$                          | $\beta = 90.3$                         |
| Space group                              | P3 <sub>1</sub> 21          | C2                                       | P2 <sub>1</sub>                        |
| <i>Non-hydrogen atoms in refinement</i>  |                             |                                          |                                        |
| Protein                                  | 2,739                       | 6,349                                    | 9,370                                  |
| Water                                    | 234                         | 0                                        | 122                                    |
| $R_{\text{cryst}}/R_{\text{free}}$ , % † | 18.9/25.0                   | 24.2/29.5                                | 20.0/23.7                              |
| rmsd from ideal                          |                             |                                          |                                        |
| Bond lengths, Å                          | 0.006                       | 0.005                                    | 0.007                                  |
| Bond angles, °                           | 0.92                        | 0.842                                    | 0.972                                  |
| <i>B-factors, Å<sup>2</sup></i>          |                             |                                          |                                        |
| XRCC1                                    | Chain A = 27.4              | Chain B = 48.3<br>Chain C = 64.5         | Average of all eight chains = 39.3     |
| Pol $\beta$                              | Chain B = 23.3              | Chain D = 46.3<br>Chain E = 51.9         |                                        |
| Water                                    | 25.4                        |                                          | 19.5                                   |

\*Numbers in parentheses represent values in the highest resolution shell.

† $R_{\text{free}}$  is the  $R$  factor based on 5% of data excluded from refinement.

**Table S3. Interprotein hydrogen bonding and salt bridge interactions**

| Direct hydrogen bonds—reduced XRCC1 |           |              | Direct hydrogen bonds—oxidized XRCC1 |          |              |
|-------------------------------------|-----------|--------------|--------------------------------------|----------|--------------|
| Pol $\beta$ CD                      | Dist., Å* | XRCC1        | Pol $\beta$ PT                       | Dist., Å | XRCC1        |
| GLU 309[OE1]                        | 3.4/3.2   | ARG 109[NH1] | GLU 309[OE1]                         | 2.7      | SER 92[N]    |
| GLU 309[OE2]                        | 3.2/3.8   | ARG 109[NH2] | GLU 309[OE1]                         | 2.7      | ARG 109[NH1] |
| ASP 321[OD2]                        | 3.6/4.4   | ARG 100[NH2] | ASP 321[OD1]                         | 3.0      | ARG 100[NH1] |
| ASP 321[OD2]                        | 3.7/4.6   | SER 97[OG]   | ASP 321[OD2]                         | 3.0      | ARG 100[NH2] |
| TYR 322[O]                          | 2.9/2.9   | TYR 136[OH]  | TYR 322[O]                           | 2.6      | TYR 136[OH]  |
| VAL 303[N]                          | 2.7/3.0   | GLU 69[OE2]  | VAL 303[N]                           | 3.0      | GLU 69[OE2]  |
| GLU 309[N]                          | 3.7/3.2   | THR 90[O]    | GLU 309[N]                           | 3.1      | THR 90[O]    |
| GLN 324[NE2]                        | 2.4/3.3   | PRO 135[O]   | GLN 324[NE2]                         | 3.4      | PRO135[O]    |
| GLU 309[OE1]                        | 3.1/2.8   | SER 92[N]    | GLU 309[OE2]                         | 3.0      | ARG 109[NH2] |

\*Values shown are for molecules CE/BD.
